# Supplementary material for: Sex dimorphism in rodent brain responses to ketogenic diets: A comparative study
Source: Research Square preprint supplement (doi:10.21203/rs.3.rs-5185394/v1), 2024-11-14
Supplement: Supplementary file 1 [file 4767f653a0d5abb57e25c8f8.xlsx]

## Sheet: PCR primerss
Gene	Strand	Primer sequence	Cell-type
ALDH1L1	forward	GCAGGTACTTCTGGGTTGCT	Astrocyte
NM_027406.2	reverse	GGAAGGCACCCAAGGTCAAA
GFAP	forward	AGAAAGGTTGAATCGCTGGA	Astrocyte
NM_010277.3	reverse	CGGCGATAGTCGTTAGCTTC
STMN2	forward	TGCGTGCACATCCCTACAAT	Neuron
NM_025285.2	reverse	TGCTTCACCTCCATGTCGTC
SYN1	forward	TCTGACCAATGCCTTCAACCT	Neuron
NM_013680.4	reverse	GAGAAGAGGCTGGCGAAAGA
