# Supplementary material for: Sex dimorphism in rodent brain responses to ketogenic diets: A comparative study
Source: Research Square preprint supplement (doi:10.21203/rs.3.rs-5185394/v1), 2024-11-14
Supplement: Supplementary file 2 [file 5ba64d3229e40867bd5e72e8.xlsx]

## Sheet: Figures 2A & S1
Figures 2A and S1: Statistical analysis of body weight datasets from Safe's diet
		Body weight / Mouse (g)																					Normal distribution: D'Agostino & Pearson test
		CD Male										KD Male											Control Diet datasets	CD 1	CD 3	CD 5	CD 8	CD 10	CD 12	CD 15	CD 17	CD 19	CD 22	CD 24	CD 26
	Cohort	A			B			C				A			B			C					K2	0.8	2024-04-01	0.7	1.0	0.9	0.7	0.3	0.9	2024-07-01	0.3	0.8	0.7
	Mouse no	1	2	3	1	2	3	1	2	3	4	1	2	3	1	2	3	1	2	3	4		P value	0.7	0.5	0.7	0.6	0.7	0.7	0.8	0.6	0.4	0.9	0.7	0.7
Day	1	2024-04-24	2024-07-24	2024-09-21	25.0	2024-09-21	2024-08-24	2024-02-26	2024-01-20	2024-04-23	2024-02-23	2024-07-25	2024-08-21	2024-02-26	25.0	2024-01-24	24.0	2024-01-23	2024-04-23	2024-08-22	2024-05-23		Passed normality test (alpha=0.05)?	Yes	Yes	Yes	Yes	Yes	Yes	Yes	Yes	Yes	Yes	Yes	Yes
	3	25.0	2024-02-24	22.0	25.0	2024-08-21	2024-07-24	2024-02-25	2024-04-20	2024-04-23	2024-03-23	22.0	2024-05-18	2024-02-22	22.0	2024-06-19	2024-06-20	2024-01-22	2024-04-22	2024-09-21	23.0		P value summary	ns	ns	ns	ns	ns	ns	ns	ns	ns	ns	ns	ns
	5	2024-04-25	2024-02-26	2024-02-22	2024-03-25	2024-09-22	2024-05-25	27.0	2024-03-21	24.0	24.0	2024-08-20	2024-03-17	2024-06-20	2024-02-20	2024-08-17	2024-07-18	2024-07-20	2024-05-20	2024-04-21	2024-01-21		Number of values	10	10	10	10	10	10	10	10	10	10	10	10
	8	2024-04-25	2024-01-26	2024-02-22	26.0	2024-03-23	2024-01-26	2024-03-27	2024-04-22	2024-02-24	2024-01-24	2024-07-18	2024-05-15	2024-09-18	2024-04-21	2024-08-19	2024-02-17	2024-08-20	2024-06-20	2024-09-20	2024-01-20
	10	2024-06-25	2024-05-26	2024-02-22	2024-02-26	2024-07-23	27.0	2024-07-27	2024-08-22	2024-05-24	2024-08-24	2024-07-18	2024-08-14	2024-06-18	2024-09-21	2024-07-20	2024-02-16	2024-09-19	2024-08-19	2024-07-19	2024-02-19
	12	2024-09-25	2024-03-27	2024-07-22	2024-09-26	2024-07-24	2024-08-27	2024-04-28	2024-03-23	2024-08-24	2024-03-25	20.0	2024-07-14	2024-07-18	2024-08-21	2024-08-20	2024-06-15	2024-03-20	2024-05-20	2024-04-20	2024-08-19		Ketogenic Diet datasets	KD 1	KD 3	KD 5	KD 8	KD 10	KD 12	KD 15	KD 17	KD 19	KD 22	KD 24	KD 26
	15	2024-07-26	2024-04-27	2024-06-23	2024-08-26	2024-04-25	2024-07-28	2024-07-28	2024-01-24	2024-03-25	2024-08-25	2024-08-20	2024-04-14	2024-01-19	2024-04-23	2024-06-21	2024-08-16	2024-09-19	2024-07-20	2024-04-19	2024-01-20		K2	0.2	2024-02-04	2024-04-02	2024-03-03	2024-04-02	2024-04-04	2024-08-02	2024-05-04	2024-01-07	2024-02-03	2024-09-02	2024-04-09
	17	2024-07-26	2024-03-27	2024-03-24	2024-06-27	2024-08-25	2024-07-28	29.0	2024-05-24	2024-01-25	26.0	2024-09-21	15.0	2024-05-19	2024-05-23	21.0	2024-07-17	2024-05-20	21.0	2024-02-20	2024-09-20		P value	0.9	0.1	0.3	0.2	0.3	0.1	0.2	0.1	0.03	0.2	0.2	0.01
	19	2024-09-27	2024-06-27	2024-07-24	2024-05-27	26.0	2024-01-29	2024-01-29	2024-06-24	2024-05-25	2024-08-25	23.0	2024-07-16	2024-02-22	2024-09-23	2024-01-21	2024-09-18	2024-06-22	2024-04-22	22.0	2024-04-22		Passed normality test (alpha=0.05)?	Yes	Yes	Yes	Yes	Yes	Yes	Yes	Yes	No	Yes	Yes	No
	22	2024-03-27	2024-06-27	2024-06-24	2024-02-28	2024-08-26	2024-04-29	30.0	2024-07-25	2024-01-25	2024-06-26	2024-07-22	2024-04-17	2024-03-22	2024-04-23	2024-01-20	2024-07-18	2024-05-23	2024-05-23	2024-04-23	2024-04-23		P value summary	ns	ns	ns	ns	ns	ns	ns	ns	*	ns	ns	**
	24	2024-08-27	2024-09-26	2024-07-24	28.0	2024-05-26	29.0	2024-07-29	2024-05-25	2024-02-25	2024-01-26	2024-08-22	2024-03-17	2024-08-22	2024-08-23	2024-01-20	2024-05-18	2024-09-23	2024-09-23	2024-02-24	2024-01-24		Number of values	10	10	10	10	10	10	10	10	10	10	10	10
	26	2024-04-28	28.0	2024-07-25	2024-04-28	2024-07-26	2024-02-29	2024-07-30	2024-02-26	26.0	2024-03-27	23.0	2024-03-17	23.0	2024-03-25	22.0	2024-01-21	2024-06-24	2024-08-23	2024-03-24	2024-04-24
																							Type of Test	Unpaired T-test	Unpaired T-test	Unpaired T-test	Unpaired T-test	Unpaired T-test	Unpaired T-test	Unpaired T-test	Unpaired T-test	Mann-Whitney T-test	Unpaired T-test	Unpaired T-test	Mann-Whitney T-test
																							Data organization	CD 1 vs KD 1	CD 3 vs KD 3	CD 5 vs KD 5	CD 8 vs KD 8	CD 10 vs KD 10	CD 12 vs KD 12	CD 15 vs KD 15	CD 17 vs KD 17	CD 19 vs KD 19	CD 22 vs KD 22	CD 24 vs KD 24	CD 26 vs KD 26
																							Number of values	10 vs 10	10 vs 10	10 vs 10	10 vs 10	10 vs 10	10 vs 10	10 vs 10	10 vs 10	10 vs 10	10 vs 10	10 vs 10	10 vs 10
																							P value	0.58	0.007	<0.001	<0.001	<0.001	<0.001	<0.001	<0.001	<0.001	<0.001	<0.001	<0.001
																							P value summary	ns	**	***	***	***	***	***	***	***	***	***	***
																							Significantly different (P < 0.05)?	No	Yes	Yes	Yes	Yes	Yes	Yes	Yes	Yes	Yes	Yes	Yes
																							One- or two-tailed P value?	Two-tailed	Two-tailed	Two-tailed	Two-tailed	Two-tailed	Two-tailed	Two-tailed	Two-tailed	Two-tailed	Two-tailed	Two-tailed	Two-tailed
																							t, df or Sum of ranks in column I,U	t=0.5584, df=18	t=3.043, df=18	t=6.048, df=18	t=6.693, df=18	t=7.031, df=18	t=6.828, df=18	t=6.888, df=18	t=7.011, df=18	155 , 55	t=5.791, df=18	t=4.981, df=18	155 , 55
																							How big is the difference?
																							Mean of column A or Median of column I	23.54	23.49	24.36	2024-07-24	2024-09-25	2024-07-25	26.24	26.48	26.73, n=10	27.13	26.93	27.65, n=10
																							Mean of column M or Median of column U	23.94	21.41	19.89	19.35	18.94	19.24	19.61	2024-12-20	22.30, n=10	21.84	22.13	23.40, n=10
																							Difference between means (M - A) ± SEM or Difference: Actual	0.4000 ± 0.7163	-2.079 ± 0.6833	-4.470 ± 0.7391	-5.352 ± 0.7997	-6.153 ± 0.8751	-6.467 ± 0.9472	-6.629 ± 0.9624	-6.365 ± 0.9078	-4.425	-5.289 ± 0.9133	-4.799 ± 0.9635	-4.25
																							95% confidence interval or Difference: Hodges-Lehmann	-1.105 to 1.905	-3.515 to -0.6435	-6.023 to -2.917	-7.032 to -3.672	-7.992 to -4.314	-8.457 to -4.477	-8.651 to -4.607	-8.272 to -4.458	-5.08	-7.208 to -3.370	-6.823 to -2.775	-4.27
																							R squared (eta squared)	0.01703	0.3396	0.6702	0.7133	0.7331	0.7214	0.725	0.732		0.6507	0.5795
																							F test to compare variances
																							F, DFn, Dfd	1.761, 9, 9	1.330, 9, 9	1.626, 9, 9	1.142, 9, 9	1.286, 9, 9	1.488, 9, 9	2.098, 9, 9	2.015, 9, 9	1.659, 9, 9	1.678, 9, 9	2.337, 9, 9	2.179, 9, 9
																							P value	0.41	0.68	0.48	0.85	0.71	0.56	0.28	0.31	0.46	0.45	0.22	0.26
																							P value summary	ns	ns	ns	ns	ns	ns	ns	ns	ns	ns	ns	ns
																							Significantly different (P < 0.05)?	No	No	No	No	No	No	No	No	No	No	No	No
																							Descriptive statistics	CD Male			KD Male
																							Days	Mean	SEM	N	Mean	SEM	N
																							1	2024-05-23	0.6	10	2024-09-23	0.4	10
																							3	2024-05-23	0.5	10	2024-04-21	0.4	10
																							5	2024-04-24	0.6	10	2024-09-19	0.5	10
																							8	2024-07-24	0.5	10	2024-03-19	0.6	10
																							10	2024-01-25	0.6	10	2024-09-18	0.7	10
																							12	2024-07-25	0.6	10	2024-02-19	0.7	10
																							15	2024-02-26	0.5	10	2024-06-19	0.8	10
																							17	2024-05-26	0.5	10	2024-01-20	0.7	10
																							19	2024-07-26	0.5	10	2024-05-21	0.7	10
																							22	2024-01-27	0.6	10	2024-08-21	0.7	10
																							24	2024-09-26	0.5	10	2024-01-22	0.8	10
																							26	2024-07-27	0.5	10	2024-09-22	0.7	10

## Sheet: Figure 2B
Figure 2B: Statistical analysis of body weight gain between CD and KD male
		Body weight loss (%)					Test for normal distribution
Cohort	Mouse no	CD₁₂ Male	KD₁₂ Male	CD₂₆ Male	KD₂₆ Male		D'Agostino & Pearson test	CD₁₂ Male	KD₁₂ Male	CD₂₆ Male	KD₂₆ Male
A	1	2024-02-06	-22.3	2024-06-16	-10.5		K2	0.2	2024-03-02	2024-05-08	2024-04-01
	2	2024-07-10	-32.7	2024-06-13	-20.6		P value	0.9	0.3	0.0	0.5
	3	2024-05-03	-28.5	2024-02-17	-12.2		Passed normality test (alpha=0.05)?	Yes	Yes	No	Yes
B	1	2024-07-07	-13.1	2024-07-13	2024-01-01		P value summary	ns	ns	*	ns
	2	2024-07-12	-13.5	2024-08-21	-8.7
	3	2024-03-12	-35.1	2024-01-18	-11.9
C	1	2024-06-08	-12.1	2024-02-17	2024-03-06		Kruskal-Wallis test
	2	2024-09-15	-12.6	2024-03-30	2024-07-01		P value	<0.001
	3	6.0	-10.3	2024-01-11	2024-06-06		Exact or approximate P value?	Approximate
	4	2024-01-09	-15.8	2024-07-17	2024-08-03		P value summary	***
							Do the medians vary signif. (P < 0.05)?	Yes
							Number of groups	4
							Kruskal-Wallis statistic	33.7
							Dunn's multiple comparisons test	Mean rank diff.	Significant?	Summary	Adjusted P Value
							CD12 vs. KD12	2024-08-18	Yes	**	0.0
							CD12 vs. CD26	-9.7	No	ns	0.4
							CD12 vs. KD26	2024-01-10	No	ns	0.3
							KD12 vs. CD26	-28.5	Yes	***	<0.001
							KD12 vs. KD26	-8.7	No	ns	0.6
							CD26 vs. KD26	2024-08-19	Yes	***	<0.001
							Test details	Mean rank 1	Mean rank 2	Mean rank diff.	n1	n2	Z
							CD12 vs. KD12	2024-03-25	2024-05-06	2024-08-18	10.0	10.0	2024-06-03
							CD12 vs. CD26	2024-03-25	35.0	-9.7	10.0	10.0	2024-09-01
							CD12 vs. KD26	2024-03-25	2024-02-15	2024-01-10	10.0	10.0	2024-09-01
							KD12 vs. CD26	2024-05-06	35.0	-28.5	10.0	10.0	2024-05-05
							KD12 vs. KD26	2024-05-06	2024-02-15	-8.7	10.0	10.0	2024-07-01
							CD26 vs. KD26	35.0	2024-02-15	2024-08-19	10.0	10.0	2024-08-03
							Descriptive statistics	CD₁₂ Male	KD₁₂ Male	CD₂₆ Male	KD₂₆ Male
							Number of values	10	10	10	10
							Mean	2024-03-09	-20.0	18.0	-4.4
							Std. Deviation	2024-07-03	2024-03-09	2024-03-05	2024-05-09
							Std. Error of Mean	2024-02-01	3.0	2024-07-01	3.0

## Sheet: Figures 2C & S2
Figures 2C and S2: Statistical analysis of glycemia datasets from Safe's diet
		Glycemia / Mouse (mM)																					Normal distribution: D'Agostino & Pearson test
		CD Male										KD Male											Control Diet datasets	CD 1	CD 3	CD 5	CD 8	CD 10	CD 12	CD 15	CD 17	CD 19	CD 22	CD 24	CD 26
	Cohort	A			B			C				A			B			C					K2	1.0	0.0	2024-07-01	0.1	1.0	0.4	0.1	2024-05-02	2024-01-04	0.1	2024-02-01	0.4
	Mouse no	1	2	3	1	2	3	1	2	3	4	1	2	3	1	2	3	1	2	3	4		P value	0.6	>0.99	0.4	0.9	0.6	0.8	1.0	0.3	0.1	1.0	0.5	0.8
Day	1	2024-06-12	2024-03-12	2024-03-14	2024-03-11	2024-07-09	2024-08-09	2024-07-09	9.0	2024-04-11	2024-09-10	2024-03-08	2024-02-09	2024-09-09	2024-08-08	2024-02-11	2024-02-09	2024-01-13	2024-05-12	2024-07-15	2024-01-11		Passed normality test (alpha=0.05)?	Yes	Yes	Yes	Yes	Yes	Yes	Yes	Yes	Yes	Yes	Yes	Yes
	3	2024-03-16	2024-08-13	2024-06-10	2024-07-13	2024-01-08	2024-02-10	2024-02-12	2024-06-12	2024-05-09	13.0	2024-09-05	2024-08-03	2024-09-03	2024-06-04	2024-01-04	2024-04-03	2024-02-11	9.0	2024-06-10	2024-07-12		P value summary	ns	ns	ns	ns	ns	ns	ns	ns	ns	ns	ns	ns
	5	2024-06-15	2024-02-13	2024-02-10	2024-08-14	2024-09-08	2024-07-12	2024-01-11	14.0	2024-09-07	2024-04-09	3.0	2024-01-02	2024-01-03	2024-05-02	2024-02-04	2024-06-03	2024-06-05	2024-07-02	2024-05-04	2024-07-02		Number of values	10	10	10	10	10	10	10	10	10	10	10	10
	8	13.0	2024-01-10	2024-02-11	2024-05-10	2024-08-10	2024-01-12	2024-04-10	2024-07-11	2024-02-09	9.0	2024-04-02	2024-06-02	2024-01-03	2024-01-05	2024-01-04	2024-05-02	2024-09-04	2024-01-04	2024-05-04	2024-03-07
	10	2024-06-16	15.0	2024-04-08	2024-08-09	2024-03-10	2024-03-11	2024-09-09	2024-01-14	2024-08-14	2024-09-18	2024-02-03	2024-01-02	2024-04-03	2024-06-04	2024-09-07	2024-01-02	2024-01-03	2024-09-06	2024-08-07	2024-09-02
	12	2024-08-12	2024-01-14	2024-09-10	8.0	2024-06-11	2024-03-13	2024-06-10	2024-04-11	2024-01-08	2024-07-09	2024-01-03	2024-06-01	2024-08-02	2024-03-04	2024-06-03	2024-03-03	2024-09-03	2024-09-04	2024-07-04	2024-02-04		Ketogenic Diet datasets	KD 1	KD 3	KD 5	KD 8	KD 10	KD 12	KD 15	KD 17	KD 19	KD 22	KD 24	KD 26
	15	2024-07-12	15.0	2024-06-15	2024-03-11	2024-09-11	2024-02-12	2024-09-09	2024-09-09	2024-03-13	2024-03-08	2024-08-06	2024-01-04	2024-09-04	2024-01-07	2024-01-07	2024-02-06	2024-03-06	2024-04-03	2024-04-03	2024-08-03		K2	2024-04-02	3.0	2024-03-02	2024-07-02	2024-03-02	2024-09-01	2024-01-05	2024-04-03	0.8	1.0	0.6	2024-09-01
	17	2024-02-11	2024-05-14	2024-07-12	2024-02-15	2024-08-14	2024-06-11	2024-01-11	2024-07-10	2024-01-10	2024-08-10	2024-07-05	2024-02-03	2024-02-04	2024-03-05	3.0	2024-01-03	2024-08-04	2024-02-04	2024-06-05	3.0		P value	0.3	0.2	0.3	0.3	0.3	0.4	0.1	0.2	0.7	0.6	0.7	0.4
	19	2024-03-09	2024-07-08	2024-08-10	2024-02-09	2024-08-07	2024-09-12	2024-08-08	2024-07-10	2024-08-09	2024-08-09	2024-04-06	2024-08-02	2024-06-07	2024-06-05	2024-07-03	2024-03-03	2024-04-11	2024-06-10	2024-08-05	2024-06-08		Passed normality test (alpha=0.05)?	Yes	Yes	Yes	Yes	Yes	Yes	Yes	Yes	Yes	Yes	Yes	Yes
	22	2024-02-12	2024-02-08	2024-02-09	2024-09-07	2024-08-10	2024-09-11	2024-09-05	2024-03-10	2024-06-13	2024-05-09	2024-05-04	2024-02-03	2024-02-05	5.0	4.0	2024-03-03	8.0	2024-08-06	2024-03-08	2024-07-05		P value summary	ns	ns	ns	ns	ns	ns	ns	ns	ns	ns	ns	ns
	24	2024-07-15	2024-09-10	2024-04-13	10.0	2024-09-09	2024-01-15	2024-09-10	2024-08-10	2024-05-12	2024-08-12	2024-07-04	2024-01-02	2024-02-09	2024-04-06	2024-03-03	2024-05-04	2024-01-14	2024-08-07	2024-06-10	2024-05-08		Number of values	10	10	10	10	10	10	10	10	10	10	10	10
	26	2024-07-12	2024-01-10	2024-07-11	2024-05-09	2024-02-09	2024-03-11	2024-09-09	2024-03-10	2024-07-07	2024-05-10	2024-02-04	2024-03-02	2024-03-03	2024-07-08	2024-09-08	2024-06-07	2024-03-09	2024-05-07	2024-08-09	2024-06-07
																							Type of Test	Unpaired T-test	Unpaired T-test	Welch's T-test	Unpaired T-test	Unpaired T-test	Welch's T-test	Unpaired T-test	Unpaired T-test	Welch's T-test	Unpaired T-test	Unpaired T-test	Unpaired T-test
																							Data organization	CD 1 vs KD 1	CD 3 vs KD 3	CD 5 vs KD 5	CD 8 vs KD 8	CD 10 vs KD 10	CD 12 vs KD 12	CD 15 vs KD 15	CD 17 vs KD 17	CD 19 vs KD 19	CD 22 vs KD 22	CD 24 vs KD 24	CD 26 vs KD 26
																							Number of values	10 vs 10	10 vs 10	10 vs 10	10 vs 10	10 vs 10	10 vs 10	10 vs 10	10 vs 10	10 vs 10	10 vs 10	10 vs 10	10 vs 10
																							P value	0.83	0.002	<0.001	<0.001	<0.001	<0.001	<0.001	<0.001	0.009	<0.001	0.001	0.002
																							P value summary	ns	**	***	***	***	***	***	***	**	***	**	**
																							Significantly different (P < 0.05)?	No	Yes	Yes	Yes	Yes	Yes	Yes	Yes	Yes	Yes	Yes	Yes
																							One- or two-tailed P value?	Two-tailed	Two-tailed	Two-tailed	Two-tailed	Two-tailed	Two-tailed	Two-tailed	Two-tailed	Two-tailed	Two-tailed	Two-tailed	Two-tailed
																							t, df	t=0.2226, df=18	t=3.723, df=18	t=9.246, df=11.89	t=10.84, df=18	t=6.497, df=18	t=10.29, df=12.97	t=7.663, df=18	t=11.62, df=18	t=3.071, df=12.92	t=4.922, df=18	t=3.827, df=18	t=3.537, df=18
																							How big is the difference?
																							Mean of column A	2024-01-11	12	11.78	2024-08-10	12.91	2024-05-11	2024-01-12	12.27	9.78	9.95	2024-02-12	10.29
																							Mean of column M	2024-09-10	6.92	2024-04-03	2024-06-04	2024-04-04	3.64	5.31	4.21	6.58	2024-04-05	2024-12-07	6.92
																							Difference between means (M - A) ± SEM	-0.2000 ± 0.8984	-5.082 ± 1.365	-8.380 ± 0.9064	-6.740 ± 0.6215	-8.510 ± 1.310	-7.410 ± 0.7204	-6.700 ± 0.8743	-8.060 ± 0.6937	-3.200 ± 1.042	-4.550 ± 0.9244	-5.080 ± 1.327	-3.370 ± 0.9529
																							95% confidence interval	-2.087 to 1.687	-7.950 to -2.214	-10.36 to -6.403	-8.046 to -5.434	-11.26 to -5.758	-8.967 to -5.853	-8.537 to -4.863	-9.517 to -6.603	-5.452 to -0.9479	-6.492 to -2.608	-7.869 to -2.291	-5.372 to -1.368
																							R squared (eta squared)	0.002746	0.435	0.8779	0.8673	0.7011	0.8908	0.7654	0.8824	0.4219	0.5737	0.4486	0.41
																							F test to compare variances
																							F, DFn, Dfd	2.012, 9, 9	2.194, 9, 9	6.068, 9, 9	1.476, 9, 9	2.281, 9, 9	4.305, 9, 9	2.184, 9, 9	2.985, 9, 9	4.357, 9, 9	1.612, 9, 9	3.171, 9, 9	3.652, 9, 9
																							P value	0.31	0.26	0.01	0.57	0.24	0.04	0.26	0.12	0.04	0.49	0.1	0.07
																							P value summary	ns	ns	*	ns	ns	*	ns	ns	*	ns	ns	ns
																							Significantly different (P < 0.05)?	No	No	Yes	No	No	Yes	No	No	Yes	No	No	No
																							Descriptive statistics	CD Male			KD Male
																							Days	Mean	SEM	N	Mean	SEM	N
																							1	2024-01-11	0.5	10	2024-09-10	0.7	10
																							3	12.0	0.8	10	2024-09-06	2024-01-01	10
																							5	2024-08-11	0.8	10	2024-04-03	0.3	10
																							8	2024-08-10	0.4	10	2024-01-04	0.5	10
																							10	2024-09-12	2024-01-01	10	2024-04-04	0.7	10
																							12	2024-01-11	0.6	10	2024-06-03	0.3	10
																							15	12.0	0.7	10	2024-03-05	0.5	10
																							17	2024-03-12	0.6	10	2024-02-04	0.3	10
																							19	2024-08-09	0.5	10	2024-06-06	0.9	10
																							22	10.0	0.7	10	2024-04-05	0.6	10
																							24	2024-02-12	0.6	10	2024-01-07	2024-02-01	10
																							26	2024-03-10	0.4	10	2024-09-06	0.8	10

## Sheet: Figure 2D
Figure 2D: Statistical analysis of glycemia variation between CD and KD male
		Glycemia change (%)					Test for normal distribution
Cohort	Mouse no	CD₁₂ Male	KD₁₂ Male	CD₂₆ Male	KD₂₆ Male		D'Agostino & Pearson test	CD₁₂ Male	KD₁₂ Male	CD₂₆ Male	KD₂₆ Male
A	1	2024-06-01	-62.7	0.8	-49.4		K2	2024-09-01	2024-04-01	0.1	0.2
	2	2024-06-14	-82.6	-17.9	-75.0		P value	0.4	0.5	0.9	0.9
	3	-23.8	-71.7	-18.2	-66.7		Passed normality test (alpha=0.05)?	Yes	Yes	Yes	Yes
B	1	-29.2	-51.1	-15.9	-1.1		P value summary	ns	ns	ns	ns
	2	2024-06-19	-67.9	-5.2	-20.5
	3	35.7	-64.1	2024-03-15	-17.4		Welch's ANOVA test
C	1	2024-03-09	-70.2	2024-01-02	-29.0		W (DFn, DFd)	53.0 (3.00, 18.3)
	2	2024-07-26	-60.8	2024-04-14	-40.0		P value	<0.001
	3	-28.9	-70.1	-32.5	-37.6		P value summary	***
	4	-11.0	-62.2	-3.7	-31.5		Significant diff. among means (P < 0.05)?	Yes
							Dunnett's T3 multiple comparisons test	Mean Diff.	95.00% CI of diff.	Below threshold?	Summary	Adjusted P Value
							CD12 vs. KD12	67.8	42.9 to 92.7	Yes	***	<0.001
							CD12 vs. CD26	2024-05-07	-19.1 to 34.1	No	ns	0.9
							CD12 vs. KD26	38.3	8.10 to 68.5	Yes	**	0.0
							KD12 vs. CD26	-60.3	-76.8 to -43.7	Yes	***	<0.001
							KD12 vs. KD26	-29.5	-53.3 to -5.75	Yes	*	0.0
							CD26 vs. KD26	2024-07-30	5.30 to 56.2	Yes	*	0.0
							Test details	Mean 1	Mean 2	Mean Diff.	SE of diff.	n1	n2	t	DF
							CD12 vs. KD12	2024-05-01	-66.3	67.8	2024-09-07	10.0	10.0	2024-06-08	2024-02-11
							CD12 vs. CD26	2024-05-01	-6.1	2024-05-07	2024-09-08	10.0	10.0	0.8	2024-04-15
							CD12 vs. KD26	2024-05-01	-36.8	38.3	2024-03-10	10.0	10.0	2024-07-03	18.0
							KD12 vs. CD26	-66.3	-6.1	-60.3	2024-05-05	10.0	10.0	11.0	14.0
							KD12 vs. KD26	-66.3	-36.8	-29.5	2024-06-07	10.0	10.0	2024-09-03	2024-04-11
							CD26 vs. KD26	-6.1	-36.8	2024-07-30	2024-06-08	10.0	10.0	2024-06-03	2024-08-15
							Descriptive statistics	CD₁₂ Male	KD₁₂ Male	CD₂₆ Male	KD₂₆ Male
							Number of values	10	10	10	10
							Mean	2024-05-01	-66.3	-6.1	-36.8
							Std. Deviation	2024-06-23	2024-03-08	2024-02-15	2024-04-22
							Std. Error of Mean	2024-05-07	2024-06-02	2024-08-04	2024-01-07

## Sheet: Figures 2E & S3
Figures 2E and S3: Statistical analysis of blood β-HB datasets from Safe's diet
		Blood β-HB / Mouse (mM)																					Normal distribution: D'Agostino & Pearson test
		CD Male										KD Male											Control Diet datasets	CD 1	CD 3	CD 5	CD 8	CD 10	CD 12	CD 15	CD 17	CD 19	CD 22	CD 24	CD 26
	Cohort	A			B			C				A			B			C					K2	0.2	0.7	2024-09-05	2024-01-03	3.0	2024-08-08	2024-04-01	0.2	2024-04-10	2024-03-02	0.6	2024-02-03
	Mouse no	1	2	3	1	2	3	1	2	3	4	1	2	3	1	2	3	1	2	3	4		P value	0.9	0.7	0.1	0.2	0.2	0.0	0.5	0.9	0.01	0.3	0.8	0.2
Day	1	0.4	0.5	0.3	0.3	0.5	0.4	0.4	0.6	0.5	0.5	0.5	0.3	0.5	0.4	0.3	0.4	0.4	0.6	0.5	0.3		Passed normality test (alpha=0.05)?	Yes	Yes	Yes	Yes	Yes	No	Yes	Yes	No	Yes	Yes	Yes
	3	1.0	0.8	0.3	0.9	0.7	0.5	0.4	0.6	0.5	0.5	2024-06-05	2024-01-03	2024-08-03	2024-01-03	2024-03-04	2024-05-03	0.9	2024-02-02	0.6	0.6		P value summary	ns	ns	ns	ns	ns	*	ns	ns	**	ns	ns	ns
	5	0.3	0.2	0.3	0.5	0.4	0.6	2024-01-01	0.6	0.6	0.6	2024-06-03	2024-06-06	2024-08-04	2024-06-04	2024-09-05	2024-09-06	2024-05-03	2024-08-05	2024-06-02	2024-08-03		Number of values	10	10	10	10	10	10	10	10	10	10	10	10
	8	0.3	0.4	0.3	0.4	0.4	0.4	0.4	0.6	0.3	0.5	6.0	2024-07-06	2024-08-05	2024-07-02	2024-07-02	2024-09-07	2024-04-03	2024-08-06	2024-05-03	2024-06-05
	10	0.4	0.4	0.5	0.6	0.4	0.4	0.4	0.2	0.5	0.4	2024-07-03	2024-06-03	2024-06-03	8.0	2024-09-01	8.0	2024-02-05	8.0	2024-06-04	8.0
	12	0.3	0.3	0.4	0.4	0.4	0.4	0.6	0.3	0.4	0.3	2024-07-06	8.0	8.0	2024-08-07	2024-08-03	8.0	2024-05-04	2024-06-04	2024-07-03	2024-02-05		Ketogenic Diet datasets	KD 1	KD 3	KD 5	KD 8	KD 10	KD 12	KD 15	KD 17	KD 19	KD 22	KD 24	KD 26
	15	0.8	0.6	0.5	0.3	0.3	0.3	0.4	0.3	0.6	0.5	2024-04-05	7.0	2024-07-05	2024-02-02	2024-09-01	2024-06-01	2024-09-02	2024-08-06	2024-08-04	8.0		K2	0.6	0.3	2024-01-01	2024-02-02	2024-09-02	2024-07-05	2024-05-02	0.5	2024-04-01	2024-08-01	2024-09-01	2024-03-05
	17	0.6	0.5	0.5	0.4	0.3	0.4	0.4	0.3	0.5	0.5	2024-02-03	2024-04-07	2024-09-03	2024-07-03	2024-09-05	8.0	2024-09-04	2024-06-05	2024-02-06	2024-08-04		P value	0.8	0.9	0.6	0.3	0.2	0.1	0.3	0.8	0.5	0.4	0.4	0.1
	19	0.4	0.4	0.4	0.4	0.4	0.4	0.6	0.3	0.3	0.4	2024-03-02	2024-04-02	2024-01-01	2024-01-03	2024-06-04	2024-08-03	0.7	2024-02-01	0.9	2024-03-01		Passed normality test (alpha=0.05)?	Yes	Yes	Yes	Yes	Yes	Yes	Yes	Yes	Yes	Yes	Yes	Yes
	22	0.6	0.3	0.3	0.4	0.4	0.4	0.4	0.4	0.6	0.3	2024-01-03	2024-02-04	3.0	2024-02-05	2024-04-06	8.0	2024-06-01	2024-04-01	2024-01-02	2024-09-01		P value summary	ns	ns	ns	ns	ns	ns	ns	ns	ns	ns	ns	ns
	24	0.4	0.4	0.2	0.4	0.6	0.4	0.4	0.3	0.7	0.7	2024-02-03	5.0	2024-04-03	2024-01-07	2024-01-05	2024-08-06	2024-04-01	0.8	2024-03-01	2024-06-01		Number of values	10	10	10	10	10	10	10	10	10	10	10	10
	26	0.3	0.2	0.3	0.5	0.3	0.4	0.2	0.3	0.2	0.2	2024-03-04	2024-04-06	2024-07-03	2024-02-02	2024-01-01	0.8	2024-01-01	2024-04-01	2024-03-01	2024-06-01
																							Type of Test	Unpaired T-test	Welch's T-test	Welch's T-test	Welch's T-test	Welch's T-test	Mann-Whitney T-test	Welch's T-test	Welch's T-test	Mann-Whitney T-test	Welch's T-test	Welch's T-test	Welch's T-test
																							Data organization	CD 1 vs KD 1	CD 3 vs KD 3	CD 5 vs KD 5	CD 8 vs KD 8	CD 10 vs KD 10	CD 12 vs KD 12	CD 15 vs KD 15	CD 17 vs KD 17	CD 19 vs KD 19	CD 22 vs KD 22	CD 24 vs KD 24	CD 26 vs KD 26
																							Number of values	10 vs 10	10 vs 10	10 vs 10	10 vs 10	10 vs 10	10 vs 10	10 vs 10	10 vs 10	10 vs 10	10 vs 10	10 vs 10	10 vs 10
																							P value	0.66	0.003	<0.001	<0.001	<0.001	<0.001	<0.001	<0.001	<0.001	0.001	0.002	0.005
																							P value summary	ns	**	***	***	***	***	***	***	***	**	**	**
																							Significantly different (P < 0.05)?	No	Yes	Yes	Yes	Yes	Yes	Yes	Yes	Yes	Yes	Yes	Yes
																							One- or two-tailed P value?	Two-tailed	Two-tailed	Two-tailed	Two-tailed	Two-tailed	Two-tailed	Two-tailed	Two-tailed	Two-tailed	Two-tailed	Two-tailed	Two-tailed
																							t, df or Sum of ranks in column I,U	t=0.4472, df=18	t=4.011, df=9.323	t=9.204, df=9,546	t=7.913, df=9.045	t=6.803, df=9.035	55 , 155	t=5.637, df=9.097	t=9.873, df=9.068	55 , 155	t=4.652, df=9.044	t=4.224, df=9.090	t=3.624, df=9.053
																							How big is the difference?
																							Mean of column A or Median of column I	0.44	0.62	0.52	0.4	0.42	0.4000, n=10	0.46	0.44	0.4000, n=10	0.41	0.45	0.29
																							Mean of column M or Median of column U	0.42	2.77	4.808	2024-11-05	5.46	5.950, n=10	4.63	5.36	1.800, n=10	3.69	3.57	2.39
																							Difference between means (M - A) ± SEM or Difference: Actual	-0.02000 ± 0.04472	2.150 ± 0.5360	4.288 ± 0.4659	4.710 ± 0.5952	5.040 ± 0.7409	5.55	4.170 ± 0.7397	4.920 ± 0.4983	2024-04-01	3.280 ± 0.7050	3.120 ± 0.7387	2.100 ± 0.5794
																							95% confidence interval or Difference: Hodges-Lehmann	-0.1140 to 0.07396	0.9438 to 3.356	3.243 to 5.333	3.364 to 6.056	3.365 to 6.715	2024-05-05	2.499 to 5.841	3.794 to 6.046	1.35	1.686 to 4.874	1.452 to 4.788	0.7904 to 3.410
																							R squared (eta squared)	0.01099	0.6331	0.8987	0.8738	0.8367		0.7775	0.9149		0.7053	0.6625	0.592
																							F test to compare variances
																							F, DFn, Dfd	1.143, 9, 9	55.70, 9, 9	32.91, 9, 9	397.6, 9, 9	513.6, 9, 9	404.0, 9, 9	185.5, 9, 9	265.0, 9, 9	268.4, 9, 9	409.4, 9, 9	199.4, 9, 9	338.5, 9, 9
																							P value	0.85	<0.001	<0.001	<0.001	<0.001	<0.001	<0.001	<0.001	<0.001	<0.001	<0.001	<0.001
																							P value summary	ns	***	***	***	***	***	***	***	***	***	***	***
																							Significantly different (P < 0.05)?	No	Yes	Yes	Yes	Yes	Yes	Yes	Yes	Yes	Yes	Yes	Yes
																							Descriptive statistics	CD Male			KD Male
																							Days	Mean	SEM	N	Mean	SEM	N
																							1	0.4	0.03	10	0.4	0.03	10
																							3	0.6	0.07	10	2024-08-02	0.5	10
																							5	0.5	0.08	10	2024-08-04	0.5	10
																							8	0.4	0.03	10	2024-01-05	0.6	10
																							10	0.4	0.03	10	2024-05-05	0.7	10
																							12	0.4	0.03	10	6.0	0.6	10
																							15	0.5	0.05	10	2024-06-04	0.7	10
																							17	0.4	0.03	10	2024-04-05	0.5	10
																							19	0.4	0.03	10	2024-01-02	0.4	10
																							22	0.4	0.03	10	2024-07-03	0.7	10
																							24	0.5	0.05	10	2024-06-03	0.7	10
																							26	0.3	0.03	10	2024-04-02	0.6	10

## Sheet: Figure 2F
Figure 2F: Statistical analysis of blood β-HB variation between CD and KD male
		Blood β-HB change (%)					Test for normal distribution
Cohort	Mouse no	CD₁₂ Male	KD₁₂ Male	CD₂₆ Male	KD₂₆ Male		D'Agostino & Pearson test	CD₁₂ Male	KD₁₂ Male	CD₂₆ Male	KD₂₆ Male
A	1	-25.0	1240.0	-25	760		K2	2024-07-01	0.56	8.0	18.0
	2	-40.0	2566-07-01	-60	2033-03-01		P value	0.42	0.75	0.0	<0.001
	3	33.3	1500.0	0	640		Passed normality test (alpha=0.05)?	Yes	Yes	No	No
B	1	33.3	1850.0	66.7	450		P value summary	ns	ns	*	***
	2	-20.0	1166.7	-40	266.7
	3	0.0	1900.0	0	100		Kruskal-Wallis test
C	1	50.0	1025.0	-50	175		P value	<0.001
	2	-50.0	666.7	-50	133.3		Exact or approximate P value?	Approximate
	3	-20.0	640.0	-60	160		P value summary	***
	4	-40.0	1633.3	-60	433.3		Do the medians vary signif. (P < 0.05)?	Yes
							Number of groups	4
							Kruskal-Wallis statistic	32.1
							Dunn's multiple comparisons test	Mean rank diff.	Significant?	Summary	Adjusted P Value
							CD12 vs. KD12	-21.8	Yes	***	<0.001
							CD12 vs. CD26	2024-01-04	No	ns	>0.99
							CD12 vs. KD26	-14.1	Yes	*	0.04
							KD12 vs. CD26	2024-09-25	Yes	***	<0.001
							KD12 vs. KD26	2024-07-07	No	ns	0.8
							CD26 vs. KD26	-18.2	Yes	**	0.003
							Test details	Mean rank 1	Mean rank 2	Mean rank diff.	n1	n2	Z
							CD12 vs. KD12	2024-06-12	34.4	-21.8	10.0	10.0	2024-02-04
							CD12 vs. CD26	2024-06-12	2024-05-08	2024-01-04	10.0	10.0	0.8
							CD12 vs. KD26	2024-06-12	2024-07-26	-14.1	10.0	10.0	2024-07-02
							KD12 vs. CD26	34.4	2024-05-08	2024-09-25	10.0	10.0	5.0
							KD12 vs. KD26	34.4	2024-07-26	2024-07-07	10.0	10.0	2024-05-01
							CD26 vs. KD26	2024-05-08	2024-07-26	-18.2	10.0	10.0	2024-05-03
							Descriptive statistics	CD₁₂ Male	KD₁₂ Male	CD₂₆ Male	KD₂₆ Male
							Number of values	10	10	10	10
							Mean	-7.8	1419.0	-28.0	515.0
							Std. Deviation	35.0	597.0	40.0	579.0
							Std. Error of Mean	11.0	189.0	13.0	183.0

## Sheet: Figures 2G & S4
Figures 2G and S4: Statistical analysis of blood lactate datasets from Safe's diet
		Blood lactate / Mouse (mM)																					Normal distribution: D'Agostino & Pearson test
		CD Male										KD Male											Control Diet datasets	CD 1	CD 3	CD 5	CD 8	CD 10	CD 12	CD 15	CD 17	CD 19	CD 22	CD 24	CD 26
	Cohort	A			B			C				A			B			C					K2	2024-02-01	2024-07-01	2024-05-06	2024-06-01	3.0	2024-06-02	2024-07-03	0.7	2024-08-04	0.8	2024-01-05	2024-09-12
	Mouse no	1	2	3	1	2	3	1	2	3	4	1	2	3	1	2	3	1	2	3	4		P value	0.5	0.4	0.04	0.5	0.2	0.3	0.2	0.7	0.1	0.7	0.1	0.002
Day	1	2024-08-03	2024-07-03	2024-03-03	2024-06-03	2024-07-02	4.0	2024-07-04	2024-03-04	2024-07-03	2024-01-04	2024-06-04	2024-04-03	2024-09-05	2024-04-03	2024-07-02	2024-05-02	2024-08-02	2024-04-03	2024-02-03	2024-03-03		Passed normality test (alpha=0.05)?	Yes	Yes	No	Yes	Yes	Yes	Yes	Yes	Yes	Yes	Yes	No
	3	2024-02-04	2024-03-03	2024-07-03	2024-08-02	2024-07-02	3.0	2024-08-02	2024-02-03	2024-03-04	2024-06-02	2024-03-02	2024-09-03	2024-04-05	2024-03-07	2024-04-06	2024-09-07	2024-08-03	2024-02-03	0.7	2024-09-03		P value summary	ns	ns	*	ns	ns	ns	ns	ns	ns	ns	ns	**
	5	2024-03-03	2024-01-06	2024-08-02	2024-02-04	2024-07-02	2024-02-04	2024-01-02	2024-07-02	2024-04-02	2024-04-03	2024-06-02	2024-08-01	2024-08-02	2024-03-02	2024-01-03	2024-09-01	2024-03-02	2024-01-04	4.0	2024-09-02		Number of values	10	10	10	10	10	10	10	10	10	10	10	10
	8	5.0	6.0	2024-01-04	2024-05-02	2024-02-03	2024-09-02	2024-07-03	2024-09-02	2024-07-05	2024-03-02	2024-01-02	2024-06-01	2024-06-03	2024-02-02	2024-01-02	2024-03-02	2024-01-03	2024-09-01	2024-01-03	2024-05-02
	10	2024-03-03	2024-02-04	3.0	4.0	2024-07-02	2024-03-03	4.0	2024-07-02	2024-03-04	2024-01-03	2024-08-07	2024-09-07	2024-07-07	2024-05-03	2024-03-02	2024-08-01	2024-08-02	2024-02-03	2024-05-02	2024-07-03
	12	2024-07-03	2024-03-05	2024-07-04	2024-01-03	2024-05-02	2024-07-02	2024-01-02	2024-07-02	2024-08-02	2024-09-01	2024-03-02	2024-08-02	2024-06-02	2024-09-01	2024-04-04	2024-08-01	2024-03-02	2024-08-01	2024-07-02	2024-07-02		Ketogenic Diet datasets	KD 1	KD 3	KD 5	KD 8	KD 10	KD 12	KD 15	KD 17	KD 19	KD 22	KD 24	KD 26
	15	2024-09-03	2024-03-05	2024-02-02	2024-07-02	2024-01-02	2024-07-03	2024-05-03	2024-06-02	2024-05-02	2.0	2024-03-03	2024-03-04	2024-08-03	2024-03-02	2024-03-02	2024-05-03	2024-06-02	2024-04-05	2024-03-02	2024-03-02		K2	2024-01-09	0.1	1.0	1.0	2024-08-02	2024-01-11	2024-05-02	2024-07-13	18.0	0.3	2024-04-01	2024-06-03
	17	2024-08-04	2024-08-03	2024-01-04	2024-09-02	2024-09-02	2024-09-03	2024-03-03	2024-07-02	2024-04-03	2024-05-02	2024-08-05	3.0	2024-05-02	2024-09-01	2024-09-02	2024-04-02	2024-08-02	2024-02-03	2024-05-03	2024-04-03		P value	0.01	0.9	0.6	0.6	0.3	0.004	0.3	0.001	<0.001	0.9	0.5	0.2
	19	3.0	2024-01-03	2024-01-02	2.0	2.0	2024-07-02	2024-05-05	2024-06-02	2024-06-02	2024-09-04	2024-01-03	2024-08-02	2024-04-07	2024-08-02	2024-04-02	2024-05-02	2024-02-03	2024-01-03	2024-04-03	2024-05-04		Passed normality test (alpha=0.05)?	No	Yes	Yes	Yes	Yes	No	Yes	No	No	Yes	Yes	Yes
	22	2024-01-03	2024-05-03	2024-06-02	2024-06-01	2024-09-02	2024-02-02	2024-03-02	2024-09-02	2024-05-02	2024-01-03	2024-09-02	3.0	2024-03-03	2024-05-02	2024-05-02	2024-05-02	2024-08-02	3.0	2024-03-02	2024-09-02		P value summary	*	ns	ns	ns	ns	**	ns	**	***	ns	ns	ns
	24	2024-01-04	3.0	2024-02-03	2024-07-02	2024-08-02	3.0	2024-07-02	2024-09-02	2024-03-02	2024-01-02	2024-07-02	2024-07-04	2024-07-01	2024-01-04	2024-09-03	2024-08-05	2024-08-02	2024-03-02	2024-09-02	2024-09-02		Number of values	10	10	10	10	10	10	10	10	10	10	10	10
	26	2024-09-02	2024-03-03	2.0	2024-06-03	2024-09-05	2024-03-02	2024-03-03	3.0	2024-05-02	2024-03-03	2024-02-03	2024-04-02	2024-05-03	3.0	2024-07-03	2024-04-03	2024-09-01	2024-04-02	2024-01-02	2.0
																							Type of Test	Mann-Whitney T-test	Welch's T-test	Mann-Whitney T-test	Welch's T-test	Welch's T-test	Mann-Whitney T-test	Unpaired T-test	Mann-Whitney T-test	Mann-Whitney T-test	Unpaired T-test	Welch's T-test	Mann-Whitney T-test
																							Data organization	CD 1 vs KD 1	CD 3 vs KD 3	CD 5 vs KD 5	CD 8 vs KD 8	CD 10 vs KD 10	CD 12 vs KD 12	CD 15 vs KD 15	CD 17 vs KD 17	CD 19 vs KD 19	CD 22 vs KD 22	CD 24 vs KD 24	CD 26 vs KD 26
																							Number of values	10 vs 10	10 vs 10	10 vs 10	10 vs 10	10 vs 10	10 vs 10	10 vs 10	10 vs 10	10 vs 10	10 vs 10	10 vs 10	10 vs 10
																							P value	0.12	0.13	0.2	0.01	0.31	0.12	0.74	0.27	0.21	0.62	0.26	0.47
																							P value summary	ns	ns	ns	*	ns	ns	ns	ns	ns	ns	ns	ns
																							Significantly different (P < 0.05)?	No	No	No	Yes	No	No	No	No	No	No	No	No
																							One- or two-tailed P value?	Two-tailed	Two-tailed	Two-tailed	Two-tailed	Two-tailed	Two-tailed	Two-tailed	Two-tailed	Two-tailed	Two-tailed	Two-tailed	Two-tailed
																							t, df or Sum of ranks in column I,U	126 , 84	t=1.647, df=10.32	122.5 , 87.50	t=2.970, df=12.80	t=1.070, df=10.11	126 , 84	t=0.3405, df=18	120 , 90	88 , 122	t=0.5027, df=18	t=1.176, df=12.35	115 , 95
																							How big is the difference?
																							Mean of column A or Median of column I	3.750, n=10	3.26	3.050, n=10	3.83	3.46	2.750, n=10	2024-05-03	3.350, n=10	2.650, n=10	2.67	2.88	3.150, n=10
																							Mean of column M or Median of column U	3.350, n=10	4.48	2.700, n=10	2.45	4.32	2.450, n=10	3.21	2.950, n=10	3.100, n=10	2.77	3.38	2.700, n=10
																							Difference between means (M - A) ± SEM or Difference: Actual	-0.4	1.220 ± 0.7409	-0.35	-1.380 ± 0.4646	0.8600 ± 0.8035	-0.3	0.1600 ± 0.4699	-0.4	0.45	0.1000 ± 0.1989	0.5000 ± 0.4252	-0.45
																							95% confidence interval or Difference: Hodges-Lehmann	-0.5	-0.4237 to 2.864	-0.4	-2.385 to -0.3747	-0.9276 to 2.648	-0.4	-0.8273 to 1.147	-0.4	0.4	-0.3180 to 0.5180	-0.4235 to 1.424	-0.25
																							R squared (eta squared)		0.208		0.408	0.1018		0.006399			0.01384	0.1007
																							F test to compare variances
																							F, DFn, Dfd	3.417, 9, 9	13.51, 9, 9	2.261, 9, 9	4.511, 9, 9	16.17, 9, 9	2.104, 9, 9	1.035, 9, 9	2.138, 9, 9	1.517, 9, 9	3.137, 9, 9	5.173, 9, 9	2.522, 9, 9
																							P value	0.08	<0.001	0.24	0.04	<0.001	0.28	0.96	0.27	0.54	0.1	0.02	0.18
																							P value summary	ns	***	ns	*	***	ns	ns	ns	ns	ns	*	ns
																							Significantly different (P < 0.05)?	No	Yes	No	Yes	Yes	No	No	No	No	No	Yes	No
																							Descriptive statistics	CD Male			KD Male
																							Days	Mean	SEM	N	Mean	SEM	N
																							1	2024-08-03	0.2	10	2024-05-03	0.3	10
																							3	2024-03-03	0.2	10	2024-05-04	0.7	10
																							5	2024-04-03	0.4	10	2024-08-02	0.2	10
																							8	2024-08-03	0.4	10	2024-05-02	0.2	10
																							10	2024-05-03	0.2	10	2024-03-04	0.8	10
																							12	2024-02-03	0.3	10	2024-05-02	0.2	10
																							15	2024-01-03	0.3	10	2024-02-03	0.3	10
																							17	2024-04-03	0.2	10	2024-01-03	0.3	10
																							19	2024-01-03	0.4	10	2024-05-03	0.5	10
																							22	2024-07-02	0.2	10	2024-08-02	0.1	10
																							24	2024-09-02	0.2	10	2024-04-03	0.4	10
																							26	2024-02-03	0.3	10	2024-08-02	0.2	10

## Sheet: Figure 2H
Figure 2H: Statistical analysis of blood lacate variation between CD and KD male
		Blood lactate change (%)					Test for normal distribution
Cohort	Mouse no	CD₁₂ Male	KD₁₂ Male	CD₂₆ Male	KD₂₆ Male		D'Agostino & Pearson test	CD₁₂ Male	KD₁₂ Male	CD₂₆ Male	KD₂₆ Male
A	1	-2.6	-50.0	-23.7	-30.4		K2	2024-02-01	14	23.0	2024-02-05
	2	43.2	-17.6	-10.8	-29.4		P value	0.56	<0.001	<0.001	0.1
	3	42.4	-55.9	-39.4	-40.7		Passed normality test (alpha=0.05)?	Yes	No	No	Yes
B	1	-13.9	-44.1	0	-11.8		P value summary	ns	***	***	ns
	2	-7.4	63.0	118.5	37
	3	-32.5	-28.0	-42.5	36		Kruskal-Wallis test
C	1	-55.3	-17.9	-29.8	-32.1		P value	0.88
	2	-37.2	-47.1	-30.2	-29.4		Exact or approximate P value?	Approximate
	3	-24.3	-15.6	-32.4	-34.4		P value summary	ns
	4	-53.7	-18.2	-19.5	-39.4		Do the medians vary signif. (P < 0.05)?	No
							Number of groups	4
							Kruskal-Wallis statistic	0.681
							Dunn's multiple comparisons test	Mean rank diff.	Significant?	Summary	Adjusted P Value
							CD12 vs. KD12	2024-08-03	No	ns	>0.99
							CD12 vs. CD26	0.3	No	ns	>0.99
							CD12 vs. KD26	2.0	No	ns	>0.99
							KD12 vs. CD26	-3.6	No	ns	>0.99
							KD12 vs. KD26	-1.9	No	ns	>0.99
							CD26 vs. KD26	2024-07-01	No	ns	>0.99
							Test details	Mean rank 1	Mean rank 2	Mean rank diff.	n1	n2	Z
							CD12 vs. KD12	22.0	2024-02-18	2024-08-03	10.0	10.0	0.7
							CD12 vs. CD26	22.0	2024-08-21	0.3	10.0	10.0	0.0
							CD12 vs. KD26	22.0	2024-01-20	2.0	10.0	10.0	0.4
							KD12 vs. CD26	2024-02-18	2024-08-21	-3.6	10.0	10.0	0.7
							KD12 vs. KD26	2024-02-18	2024-01-20	-1.9	10.0	10.0	0.4
							CD26 vs. KD26	2024-08-21	2024-01-20	2024-07-01	10.0	10.0	0.3
							Descriptive statistics	CD₁₂ Male	KD₁₂ Male	CD₂₆ Male	KD₂₆ Male
							Number of values	10	10	10	10
							Mean	-14.0	-23.0	-11.0	-17.0
							Std. Deviation	35.0	34.0	47.0	29.0
							Std. Error of Mean	11.0	11.0	15.0	2024-03-09

## Sheet: Figures 3A & S5-Male 
Figures 3A and S5: Statistical analysis of male's body weight datasets
		Body weight / Mouse (g)																					Normal distribution: D'Agostino & Pearson test
		CD Male										KD Male											Control Diet datasets	CD 1	CD 3	CD 5	CD 8	CD 10	CD 12	CD 15	CD 17	CD 19	CD 22	CD 24	CD 26
	Cohort	A			B			C				A			B			C					K2	2024-03-01	2024-05-03	1.0	2024-04-03	0.8	2024-07-01	2.0	1.0	2024-04-01	0.9	0.9	0.7
	Mouse no	1	2	3	1	2	3	1	2	3	4	1	2	3	1	2	3	1	2	3	4		P value	0.5	0.2	0.6	0.2	0.7	0.4	0.4	0.6	0.5	0.6	0.6	0.7
Day	1	21.0	2024-05-23	2024-08-24	2024-05-25	2024-08-24	2024-01-22	2024-04-22	2024-08-22	2024-04-20	2024-09-24	2024-03-24	2024-01-24	2024-03-22	2024-05-23	2024-09-22	2024-08-23	24.0	2024-01-23	2024-05-23	2024-06-22		Passed normality test (alpha=0.05)?	Yes	Yes	Yes	Yes	Yes	Yes	Yes	Yes	Yes	Yes	Yes	Yes
	3	2024-07-21	2024-04-24	2024-01-26	2024-03-25	2024-01-25	2024-08-21	2024-07-22	2024-03-23	2024-04-21	2024-08-25	2024-04-22	2024-01-23	2024-05-20	2024-07-22	2024-04-21	2024-02-22	2024-07-22	2024-04-20	2024-07-21	2024-02-20		P value summary	ns	ns	ns	ns	ns	ns	ns	ns	ns	ns	ns	ns
	5	2024-05-21	2024-06-24	26.0	2024-04-24	2024-01-24	2024-03-22	2024-07-22	2024-05-23	2024-09-21	26.0	2024-09-20	2024-07-21	2024-06-19	2024-01-22	2024-07-20	2024-02-21	2024-04-21	2024-01-20	2024-01-21	20.0		Number of values	10	10	10	10	10	10	10	10	10	10	10	10
	8	2024-06-21	2024-08-24	2024-06-26	2024-04-25	25.0	22.0	2024-03-22	2024-04-23	2024-04-21	2024-01-26	2024-09-19	2024-09-20	2024-07-18	2024-09-21	2024-02-20	21.0	2024-04-21	2024-01-20	2024-01-20	2024-09-19
	10	2024-04-21	2024-07-24	2024-04-27	25.0	2024-09-24	2024-03-22	2024-02-22	2024-01-23	2024-04-21	26.0	2024-03-19	2024-03-20	2024-02-18	2024-03-21	2024-09-19	2024-05-20	2024-02-21	2024-03-19	2024-08-19	2024-05-19
	12	2024-07-21	25.0	2024-07-27	2024-06-26	2024-04-26	2024-06-23	2024-03-23	2024-01-24	2024-04-22	27.0	2024-03-19	2024-09-19	2024-08-17	2024-09-20	2024-02-19	2024-01-20	2024-05-21	2024-04-19	2024-03-18	2024-07-19		Ketogenic Diet datasets	KD 1	KD 3	KD 5	KD 8	KD 10	KD 12	KD 15	KD 17	KD 19	KD 22	KD 24	KD 26
	15	2024-07-21	2024-07-24	2024-04-27	2024-03-27	2024-09-26	2024-05-24	2024-03-23	2024-01-24	2024-09-21	27.0	2024-01-19	2024-08-19	2024-05-17	21.0	2024-05-19	2024-09-19	2024-03-21	2024-08-18	2024-06-19	2024-02-19		K2	1.0	2024-03-02	0.3	0.3	0.2	0.0	0.7	2024-01-01	0.6	2024-07-02	2024-03-03	2024-06-04
	17	2024-07-21	2024-03-25	2024-01-28	2024-01-27	2024-03-26	2024-06-24	2024-04-23	2024-09-23	2024-09-21	2024-08-26	2024-02-19	2024-07-19	2024-04-17	21.0	2024-04-19	2024-08-19	2024-07-21	2024-09-18	2024-09-19	2024-01-19		P value	0.6	0.3	0.9	0.9	0.9	1.0	0.7	0.6	0.7	0.3	0.2	0.1
	19	2024-02-22	2024-09-25	2024-05-28	2024-01-28	2024-04-27	2024-03-25	2024-03-24	2024-04-24	2024-03-22	2024-08-27	2024-04-19	2024-09-19	2024-02-17	2024-02-21	2024-04-19	20.0	2024-09-21	2024-08-18	2024-06-19	2024-07-18		Passed normality test (alpha=0.05)?	Yes	Yes	Yes	Yes	Yes	Yes	Yes	Yes	Yes	Yes	Yes	Yes
	22	2024-09-21	2024-08-25	2024-01-28	2024-06-28	2024-01-27	2024-06-25	2024-03-24	2024-04-24	2024-05-22	2024-05-27	2024-04-19	2024-09-19	2024-03-17	2024-07-20	2024-05-19	2024-07-19	2024-03-22	2024-09-18	2024-06-19	2024-06-18		P value summary	ns	ns	ns	ns	ns	ns	ns	ns	ns	ns	ns	ns
	24	2024-01-22	2024-08-25	2024-03-28	2024-07-27	27.0	2024-07-25	2024-06-24	2024-07-24	2024-04-22	2024-02-28	2024-01-19	2024-09-19	2024-03-17	2024-06-20	2024-03-19	2024-07-19	2024-05-22	2024-01-19	20.0	2024-09-18		Number of values	10	10	10	10	10	10	10	10	10	10	10	10
	26	2024-04-22	2024-09-26	2024-03-29	2024-07-28	2024-01-27	2024-03-26	2024-08-25	2024-04-25	2024-02-23	2024-06-28	2024-02-19	2024-09-19	2024-05-17	2024-05-20	2024-09-18	2024-07-19	2024-06-22	2024-03-19	2024-02-20	2024-07-18
																							Type of Test	Welch's T-test	Unpaired T-test	Welch's T-test	Welch's T-test	Welch's T-test	Unpaired T-test	Welch's T-test	Unpaired T-test	Unpaired T-test	Unpaired T-test	Unpaired T-test	Unpaired T-test
																							Data organization	CD 1 vs KD 1	CD 3 vs KD 3	CD 5 vs KD 5	CD 8 vs KD 8	CD 10 vs KD 10	CD 12 vs KD 12	CD 15 vs KD 15	CD 17 vs KD 17	CD 19 vs KD 19	CD 22 vs KD 22	CD 24 vs KD 24	CD 26 vs KD 26
																							Number of values	10 vs 10	10 vs 10	10 vs 10	10 vs 10	10 vs 10	10 vs 10	10 vs 10	10 vs 10	10 vs 10	10 vs 10	10 vs 10	10 vs 10
																							P value	0.77	0.006	<0.001	<0.001	<0.001	<0.001	<0.001	<0.001	<0.001	<0.001	<0.001	<0.001
																							P value summary	ns	**	***	***	***	***	***	***	***	***	***	***
																							Significantly different (P < 0.05)?	No	Yes	Yes	Yes	Yes	Yes	Yes	Yes	Yes	Yes	Yes	Yes
																							One- or two-tailed P value?	Two-tailed	Two-tailed	Two-tailed	Two-tailed	Two-tailed	Two-tailed	Two-tailed	Two-tailed	Two-tailed	Two-tailed	Two-tailed	Two-tailed
																							t, df	t=0.2970, df=11.56	t=3.116, df=18	t=4.978, df=13.01	t=5.058, df=12.76	t=5.494, df=12.59	t=6.978, df=18	t=6.917, df=12.97	t=6.747, df=18	t=7.127, df=18	t=7.210, df=18	t=7.304, df=18	t=8.004, df=18
																							How big is the difference?
																							Mean of column A	23.22	23.75	23.68	23.84	23.82	24.76	24.88	24.89	2024-06-25	25.57	25.61	26.34
																							Mean of column M	2024-04-23	21.71	20.86	20.39	19.91	2024-06-19	19.55	19.59	19.62	19.56	19.62	19.64
																							Difference between means (M - A) ± SEM	0.1770 ± 0.5959	-2.040 ± 0.6548	-2.829 ± 0.5683	-3.454 ± 0.6828	-3.915 ± 0.7126	-5.161 ± 0.7396	-5.330 ± 0.7706	-5.303 ± 0.7860	-5.982 ± 0.8393	-6.010 ± 0.8336	-5.995 ± 0.8208	-6.700 ± 0.8371
																							95% confidence interval	-1.127 to 1.481	-3.416 to -0.6644	-4.057 to -1.601	-4.932 to -1.976	-5.460 to -2.370	-6.715 to -3.607	-6.995 to -3.665	-6.954 to -3.652	-7.745 to -4.219	-7.761 to -4.259	-7.719 to -4.271	-8.459 to -4.941
																							R squared (eta squared)	0.007572	0.3503	0.6557	0.6672	0.7057	0.7301	0.7867	0.7166	0.7383	0.7428	0.7477	0.7807
																							F test to compare variances
																							F, DFn, Dfd	6.877, 9, 9	2.802, 9, 9	4.254, 9, 9	4.563, 9, 9	4.812, 9, 9	3.651, 9, 9	4.297, 9, 9	3.490, 9, 9	3.160, 9, 9	3.059, 9, 9	2.796, 9, 9	2.930, 9, 9
																							P value	0.008	0.14	0.04	0.03	0.03	0.07	0.04	0.08	0.1	0.11	0.14	0.13
																							P value summary	**	ns	*	*	*	ns	*	ns	ns	ns	ns	ns
																							Significantly different (P < 0.05)?	Yes	No	Yes	Yes	Yes	No	Yes	No	No	No	No	No
																							Descriptive statistics	CD Male			KD Male
																							Days	Mean	SEM	N	Mean	SEM	N
																							1	2024-02-23	0.6	10	2024-04-23	0.2	10
																							3	2024-07-23	0.6	10	2024-07-21	0.3	10
																							5	2024-07-23	0.5	10	2024-09-20	0.2	10
																							8	2024-08-23	0.6	10	2024-04-20	0.3	10
																							10	2024-08-23	0.6	10	2024-09-19	0.3	10
																							12	2024-08-24	0.7	10	2024-06-19	0.3	10
																							15	2024-09-24	0.7	10	2024-06-19	0.3	10
																							17	2024-09-24	0.7	10	2024-06-19	0.4	10
																							19	2024-06-25	0.7	10	2024-06-19	0.4	10
																							22	2024-06-25	0.7	10	2024-06-19	0.4	10
																							24	2024-06-25	0.7	10	2024-06-19	0.4	10
																							26	2024-03-26	0.7	10	2024-06-19	0.4	10

## Sheet: Figures 3A & S6-Female 
Figures 3A and S6: Statistical analysis of female's body weight datasets
		Body weight / Mouse (g)																					Normal distribution: D'Agostino & Pearson test
		CD Female										KD Female											Control Diet datasets	CD 1	CD 3	CD 5	CD 8	CD 10	CD 12	CD 15	CD 17	CD 19	CD 22	CD 24	CD 26
	Cohort	A			B			C				A			B			C					K2	2024-01-01	2.0	2024-09-02	2024-01-02	2024-06-01	2024-09-03	2024-03-05	2024-04-02	2024-02-04	1.0	2024-04-02	2024-01-01
	Mouse no	1	2	3	1	2	3	1	2	3	4	1	2	3	1	2	3	1	2	3	4		P value	0.6	0.4	0.2	0.4	0.4	0.1	0.1	0.3	0.1	0.6	0.3	0.6
Day	1	2024-05-19	2024-06-17	2024-03-19	2024-09-18	2024-08-18	2024-06-17	2024-05-18	2024-04-18	17.0	2024-02-19	2024-03-19	2024-01-18	2024-02-18	2024-08-17	2024-03-19	2024-09-17	2024-05-16	2024-03-18	2024-08-18	2024-06-18		Passed normality test (alpha=0.05)?	Yes	Yes	Yes	Yes	Yes	Yes	Yes	Yes	Yes	Yes	Yes	Yes
	3	2024-02-19	2024-07-16	2024-08-18	2024-09-18	2024-06-19	2024-02-17	2024-07-18	2024-02-19	2024-07-17	2024-08-18	2024-03-17	2024-09-16	2024-04-16	2024-05-16	19.0	2024-09-16	2024-07-14	2024-04-17	2024-06-17	2024-07-17		P value summary	ns	ns	ns	ns	ns	ns	ns	ns	ns	ns	ns	ns
	5	2024-09-18	2024-08-16	2024-07-18	2024-03-18	2024-03-19	2024-07-16	2024-03-19	2024-04-19	2024-03-18	2024-01-19	2024-08-15	2024-08-15	2024-07-14	2024-08-15	2024-02-18	16.0	2024-03-13	2024-07-16	17.0	2024-06-16		Number of values	10	10	10	10	10	10	10	10	10	10	10	10
	8	2024-08-18	2024-03-17	2024-06-18	2024-09-17	2024-06-18	2024-07-16	2024-07-18	2024-09-18	2024-08-17	2024-01-19	2024-03-15	2024-09-15	2024-01-14	2024-03-15	2024-08-18	2024-09-14	2024-05-13	2024-07-16	2024-05-16	2024-03-16
	10	2024-08-18	17.0	2024-01-19	2024-02-18	2024-07-19	2024-02-17	2024-02-19	2024-01-18	2024-04-17	19.0	2024-09-14	2024-05-15	2024-05-13	2024-02-15	19.0	14.0	2024-01-13	2024-04-16	2024-02-16	16.0
	12	2024-05-19	2024-06-17	2024-06-19	2024-07-17	19.0	2024-02-17	2024-09-18	19.0	2024-07-17	2024-05-19	2024-07-14	2024-04-15	2024-04-13	2024-09-14	2024-03-19	2024-08-13	2024-03-12	2024-04-16	2024-01-16	2024-04-15		Ketogenic Diet datasets	KD 1	KD 3	KD 5	KD 8	KD 10	KD 12	KD 15	KD 17	KD 19	KD 22	KD 24	KD 26
	15	2024-09-19	2024-07-17	2024-09-19	18.0	2024-07-19	2024-06-17	20.0	19.0	2024-04-17	2024-06-19	2024-07-14	2024-03-15	2024-07-12	2024-08-14	2024-08-19	2024-08-12	2024-05-11	2024-01-17	2024-07-15	2024-03-15		K2	2024-04-03	2024-02-03	2024-06-01	2024-06-01	2024-06-02	2024-03-03	2024-04-01	2024-02-01	0.5	0.1	0.2	0.4
	17	2024-01-20	2024-04-18	2024-09-19	2024-01-18	2024-07-19	2024-05-17	2024-04-19	2024-01-19	2024-06-17	2024-06-19	2024-04-14	2024-02-15	2024-01-12	2024-01-15	20.0	2024-03-12	2024-02-11	17.0	2024-08-15	15.0		P value	0.2	0.2	0.5	0.5	0.3	0.2	0.5	0.6	0.8	1.0	0.9	0.8
	19	2024-07-20	2024-06-18	2024-03-21	2024-03-18	2024-05-20	18.0	2024-03-20	21.0	2024-09-17	2024-03-20	2024-09-14	2024-05-15	2024-02-12	2024-04-15	2024-09-19	2024-08-11	2024-06-11	17.0	16.0	2024-02-15		Passed normality test (alpha=0.05)?	Yes	Yes	Yes	Yes	Yes	Yes	Yes	Yes	Yes	Yes	Yes	Yes
	22	2024-03-20	2024-09-18	2024-09-20	18.0	2024-03-21	2024-08-18	20.0	2024-06-20	2024-08-18	2024-01-20	2024-01-15	2024-03-16	12.0	2024-07-15	2024-05-19	2024-01-11	2024-06-11	2024-03-17	2024-09-15	2024-03-15		P value summary	ns	ns	ns	ns	ns	ns	ns	ns	ns	ns	ns	ns
	24	2024-07-20	2024-02-19	2024-05-21	2024-08-18	2024-04-21	2024-06-18	2024-02-20	21.0	2024-03-18	2024-02-20	2024-06-14	2024-02-16	2024-07-11	2024-06-15	2024-06-19	11.0	2024-04-11	2024-08-17	2024-08-15	2024-08-14		Number of values	10	10	10	10	10	10	10	10	10	10	10	10
	26	2024-08-20	19.0	2024-06-22	2024-07-18	2024-04-22	2024-06-19	2024-02-20	20.0	2024-03-19	2024-01-21	2024-08-14	2024-04-16	12.0	2024-08-15	2024-04-19	2024-01-11	2024-08-11	2024-09-17	2024-02-16	2024-02-15
																							Type of Test	Unpaired T-test	Unpaired T-test	Unpaired T-test	Unpaired T-test	Unpaired T-test	Welch's T-test	Welch's T-test	Welch's T-test	Unpaired T-test	Welch's T-test	Welch's T-test	Unpaired T-test
																							Data organization	CD 1 vs KD 1	CD 3 vs KD 3	CD 5 vs KD 5	CD 8 vs KD 8	CD 10 vs KD 10	CD 12 vs KD 12	CD 15 vs KD 15	CD 17 vs KD 17	CD 19 vs KD 19	CD 22 vs KD 22	CD 24 vs KD 24	CD 26 vs KD 26
																							Number of values	10 vs 10	10 vs 10	10 vs 10	10 vs 10	10 vs 10	10 vs 10	10 vs 10	10 vs 10	10 vs 10	10 vs 10	10 vs 10	10 vs 10
																							P value	0.57	0.006	<0.001	<0.001	<0.001	<0.001	<0.001	<0.001	<0.001	<0.001	<0.001	<0.001
																							P value summary	ns	**	***	***	***	***	***	***	***	***	***	***
																							Significantly different (P < 0.05)?	No	Yes	Yes	Yes	Yes	Yes	Yes	Yes	Yes	Yes	Yes	Yes
																							One- or two-tailed P value?	Two-tailed	Two-tailed	Two-tailed	Two-tailed	Two-tailed	Two-tailed	Two-tailed	Two-tailed	Two-tailed	Two-tailed	Two-tailed	Two-tailed
																							t, df	t=0.5769, df=18	t=3.118, df=18	t=4.790, df=18	t=4.704, df=18	t=4.856, df=18	t=5.051, df=12.81	t=4.760, df=12.58	t=4.754, df=11.46	t=5.202, df=18	t=5.253, df=11.81	t=5.298, df=12.14	t=5.541, df=18
																							How big is the difference?
																							Mean of column A	18.47	18.46	18.47	2024-02-18	18.35	18.54	18.87	18.93	19.67	19.75	19.96	20.35
																							Mean of column M	18.26	2024-02-17	15.96	2024-07-15	15.37	15.16	14.95	14.79	14.92	14.95	14.84	2024-04-15
																							Difference between means (M - A) ± SEM	-0.2150 ± 0.3727	-1.442 ± 0.4625	-2.508 ± 0.5236	-2.500 ± 0.5315	-2.981 ± 0.6138	-3.380 ± 0.6691	-3.920 ± 0.8235	-4.142 ± 0.8713	-4.745 ± 0.9122	-4.800 ± 0.9138	-5.115 ± 0.9655	-5.305 ± 0.9573
																							95% confidence interval	-0.9979 to 0.5679	-2.414 to -0.4703	-3.608 to -1.408	-3.617 to -1.383	-4.271 to -1.691	-4.828 to -1.932	-5.705 to -2.135	-6.050 to -2.234	-6.661 to -2.829	-6.795 to -2.805	-7.216 to -3.014	-7.316 to -3.294
																							R squared (eta squared)	0.01816	0.3506	0.5604	0.5514	0.5671	0.6657	0.6429	0.6635	0.6005	0.7002	0.6981	0.6304
																							F test to compare variances
																							F, DFn, Dfd	1.025, 9, 9	1.376, 9, 9	1.815, 9, 9	3.631, 9, 9	3.339, 9, 9	4.498, 9, 9	4.816, 9, 9	7.167, 9, 9	3.692, 9, 9	6.244, 9, 9	5.556, 9, 9	3.956, 9, 9
																							P value	0.97	0.64	0.39	0.07	0.09	0.04	0.03	0.007	0.06	0.01	0.02	0.05
																							P value summary	ns	ns	ns	ns	ns	*	*	**	ns	*	*	ns
																							Significantly different (P < 0.05)?	No	No	No	No	No	Yes	Yes	Yes	No	Yes	Yes	No
																							Descriptive statistics	CD Female			KD Female
																							Days	Mean	SEM	N	Mean	SEM	N
																							1	2024-05-18	0.3	10	2024-03-18	0.3	10
																							3	2024-05-18	0.3	10	17.0	0.4	10
																							5	2024-05-18	0.3	10	16.0	0.4	10
																							8	2024-02-18	0.2	10	2024-07-15	0.5	10
																							10	2024-04-18	0.3	10	2024-04-15	0.5	10
																							12	2024-05-18	0.3	10	2024-02-15	0.6	10
																							15	2024-09-18	0.3	10	2024-09-14	0.7	10
																							17	2024-09-18	0.3	10	2024-08-14	0.8	10
																							19	2024-07-19	0.4	10	2024-09-14	0.8	10
																							22	2024-08-19	0.3	10	15.0	0.8	10
																							24	20.0	0.4	10	2024-08-14	0.9	10
																							26	2024-03-20	0.4	10	15.0	0.9	10

[truncated: 27 more sheets: Figure 3B, Figures 3C & S7A, Figure 3D, Figure S8A, Figure S8B , Figures S8C & S7B, Figure S8D, Figures 4A & S9-Male, Figures 4A & S10-Female, Figure 4B, Figures 4C & S7C, Figure 4D, Figures 5A & S11-Male, Figures 5A & S12-Female, Figure 5B, Figures 5C & S7D, Figure 5D, Figures 6A-i & S13, Figures 6A-ii & S14, Figure 6B …]
